# Supplementary material
Source: publisher site journal article supplement (https://www.spandidos-publications.com/5944/downloadSupplementary)

Figure S1. A549 cells from the same batch were pretreated with AMD3100 (10  $\mu$ M), CCX771 (100 nM) or none for 1 h and then added to the upper well of either a 12-well (10,000 cells/well) or a 48-well (5,000 cells/well) Boyden chamber. Migration index for CXCL12 (100 ng/ml) in the presence or absence of receptor antagonists were determined after 4 h. Cell migration in the absence of CXCL12 was set to 1 and the migration index was calculated as the ratio of cells migrating in the presence and absence of CXCL12. Data are presented as the mean  $\pm$  SD (n=4-12). CXCL12, C-X-C motif chemokine 12.

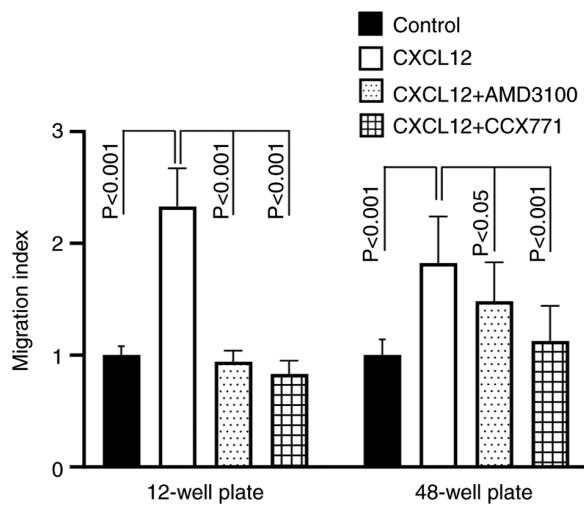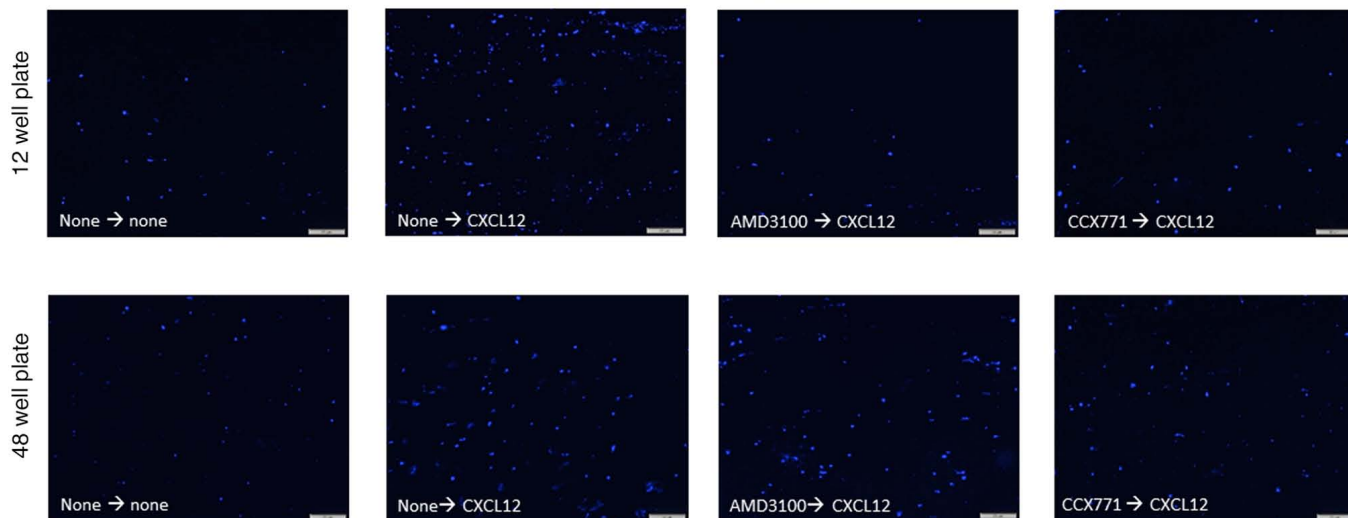

Figure S2. Representative images from chemotactic assay using PTX-treated cells. The various cancer cells (A-E) were treated with the indicated substances or none for 1 h and then tested for chemotactic responses to CXCL12 (100 ng/ml) in a modified Boyden chamber. After 4 h, migrating cells attached to the lower surface of the membrane were stained with DAPI, photographed and counted. Scale bar, 50  $\mu$ M. CXCL12, C-X-C motif chemokine 12; PTX, pertussis toxin.

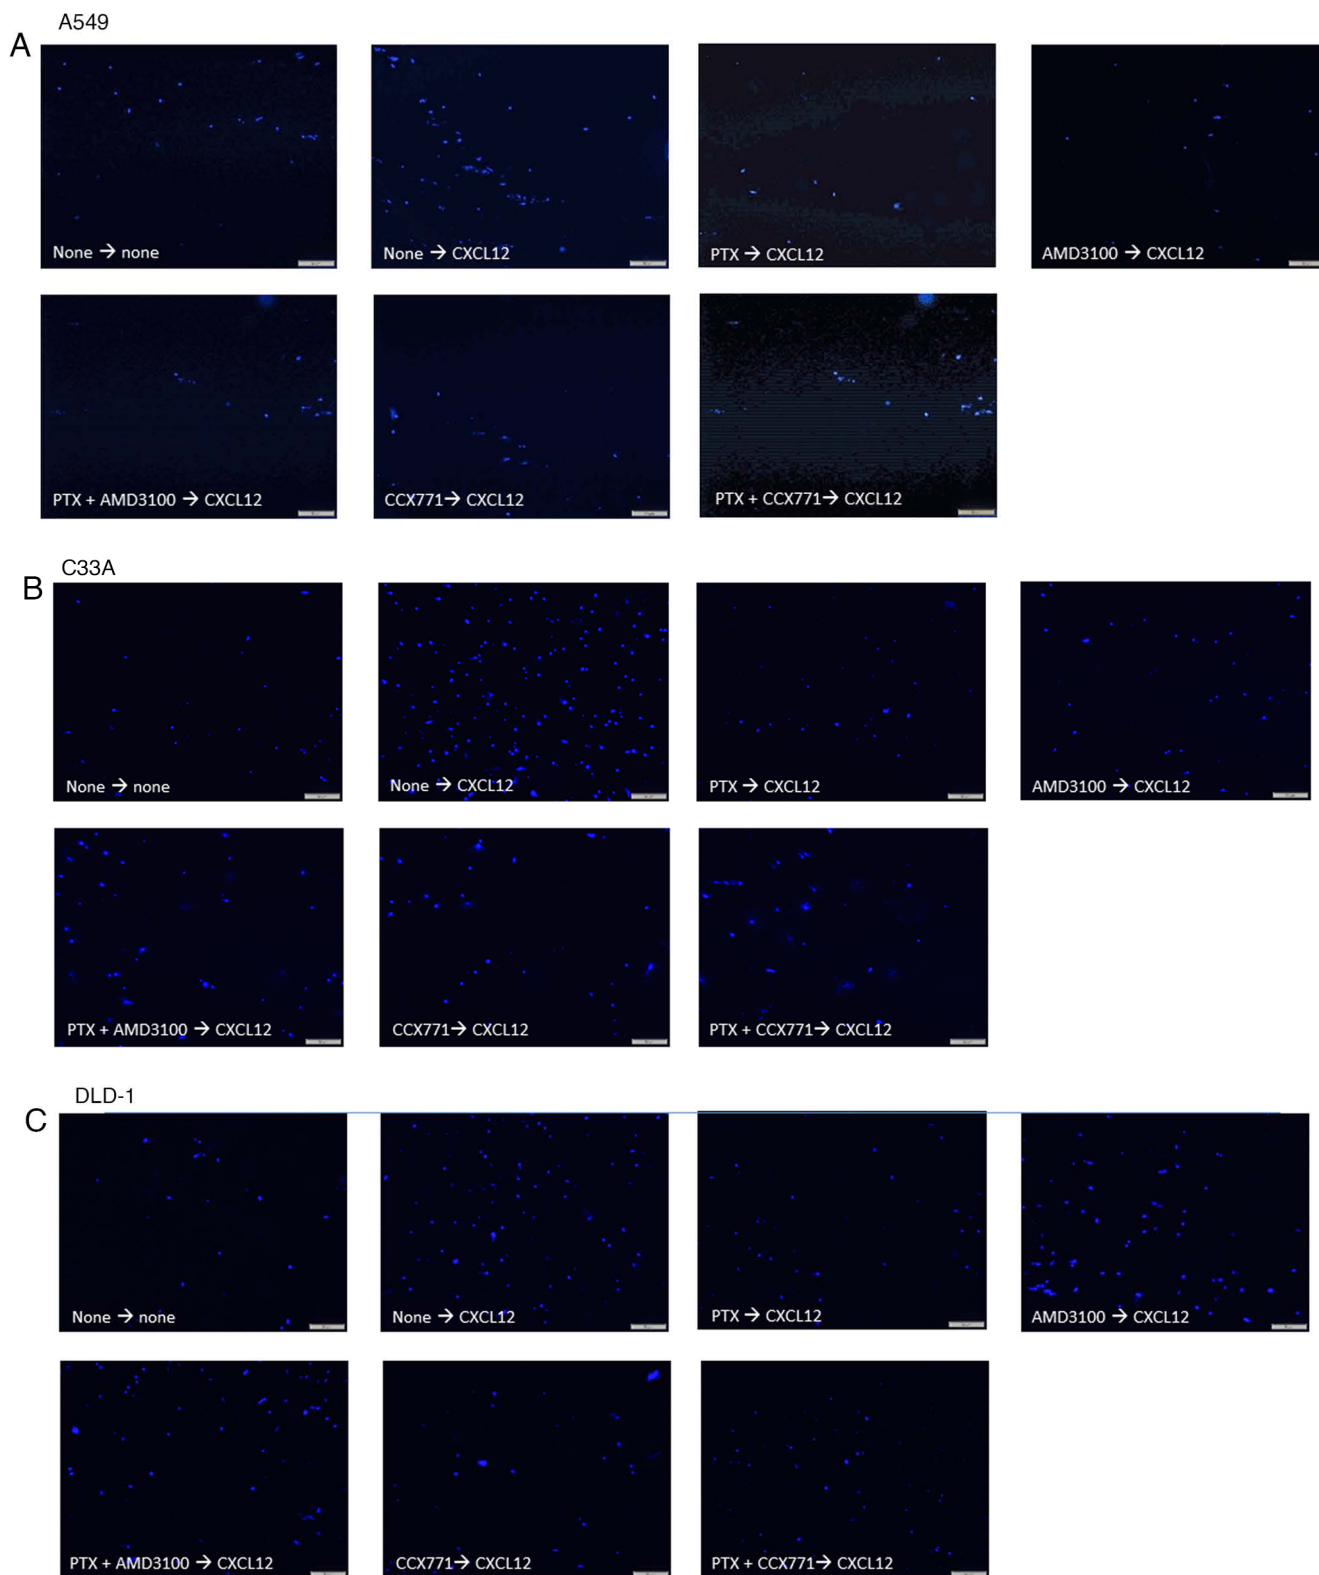

Figure S2. Continued.

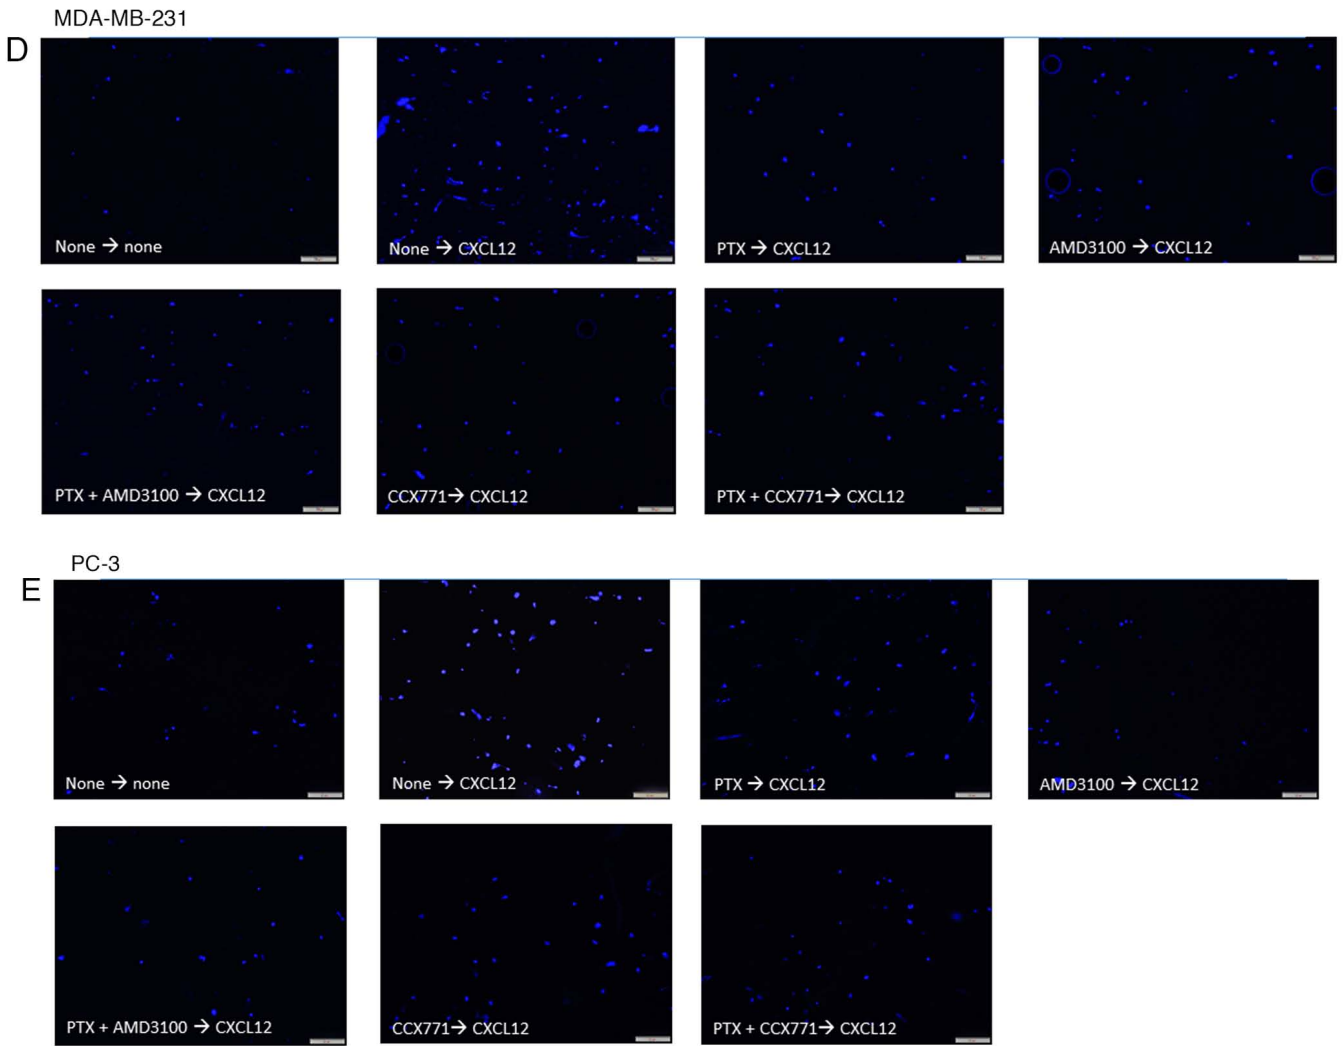

Figure S3. Analysis of the effects of  $\beta$ -arrestin siRNA on  $\beta$ -arrestin protein levels. Cells maintained in serum-free culture medium were transfected with either  $\beta$ -arrestin1 siRNA,  $\beta$ -arrestin2 siRNA or both using siPORT Amine Transfection Agent. After 2 days, the protein expression levels of  $\beta$ -arrestin1 or  $\beta$ -arrestin2 were analyzed by western blotting. To control for protein loading, membranes were re-probed with anti-GAPDH antibodies. Immunoreactive protein bands were normalized to GAPDH levels, and normalized protein levels in untreated controls were set to 1. Data are presented as the mean  $\pm$  SD (n=1-3). No statistical analysis has been provided for experiments with n<3 (A549 and PC3 cells tested for  $\beta$ -arrestin1 protein levels). Although  $\beta$ -arrestin1 protein levels tended to decrease in C33A cells transfected with  $\beta$ -arrestin1 siRNA, this decrease was not statistically significant due to the small number of replicates. \*P<0.05 and \*\*\*P<0.001 vs. control.  $\beta$ 1/ $\beta$ -arr1,  $\beta$ -arrestin1;  $\beta$ 2/ $\beta$ -arr2,  $\beta$ -arrestin2; siRNA, small interfering RNA; ns, not significant.

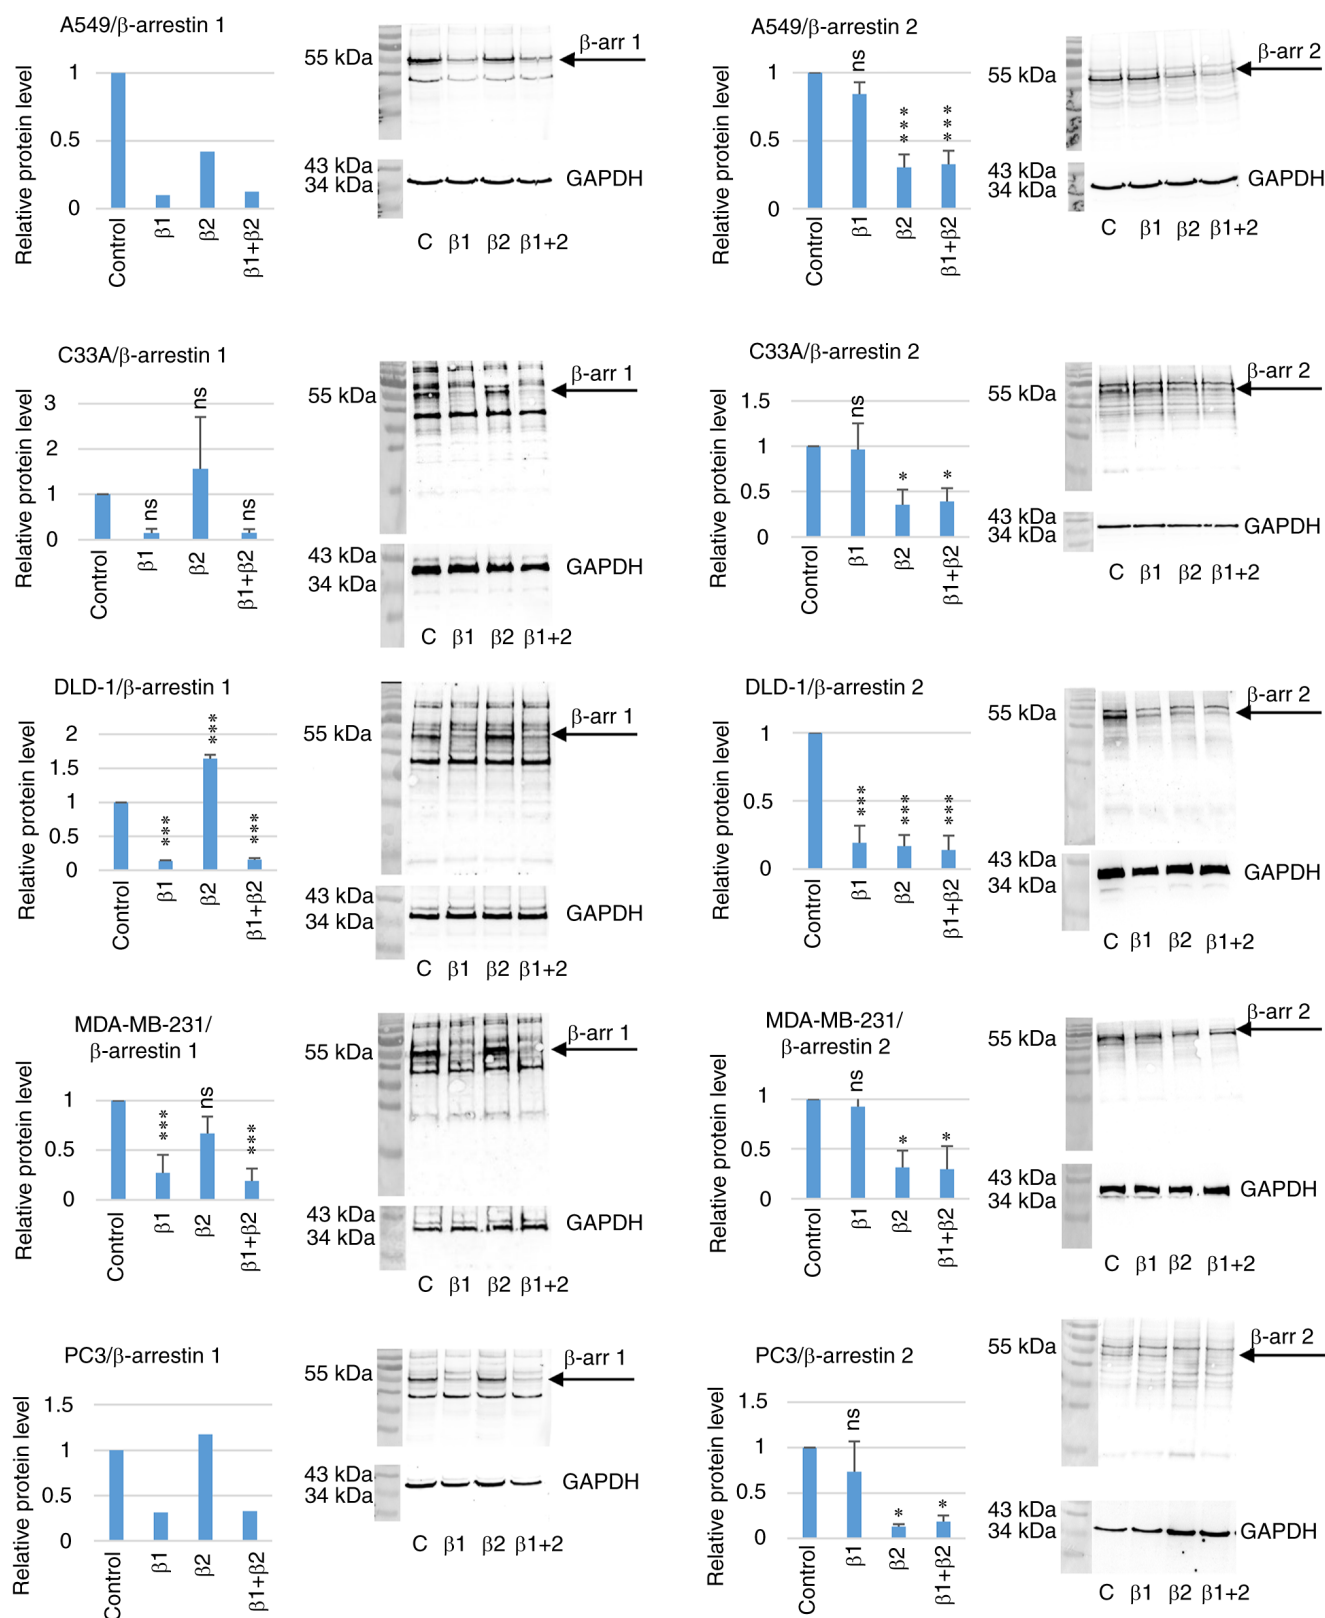

Figure S4. Analysis of the effects of  $\beta$ -arrestin siRNA on  $\beta$ -arrestin mRNA levels. Cells maintained in serum-free culture medium were transfected with either  $\beta$ -arrestin1 siRNA,  $\beta$ -arrestin2 siRNA or both using siPORT Amine Transfection Agent. After 2 days, the mRNA expression levels of  $\beta$ -arrestin1 or  $\beta$ -arrestin2 were analyzed by reverse transcription-quantitative PCR. Gene expression was calculated using the  $2^{-\Delta\Delta Cq}$  method and normalized to  $\beta$ -actin. Normalized  $\beta$ -arrestin mRNA levels in untreated controls were set to 1. Data are presented as the mean  $\pm$  SD (n=4-6). Both A549 cells transfected with  $\beta$ -arrestin 1 siRNA and DLD cells transfected with  $\beta$ -arrestin 2 siRNA showed a notable decrease in their respective mRNA levels. However, this decrease was not statistically significant due to the large variability among groups. \*P<0.05, \*\*P<0.01 and \*\*\*P<0.001 vs. control.  $\beta$ 1,  $\beta$ -arrestin1;  $\beta$ 2,  $\beta$ -arrestin2; siRNA, small interfering RNA; ns, not significant.

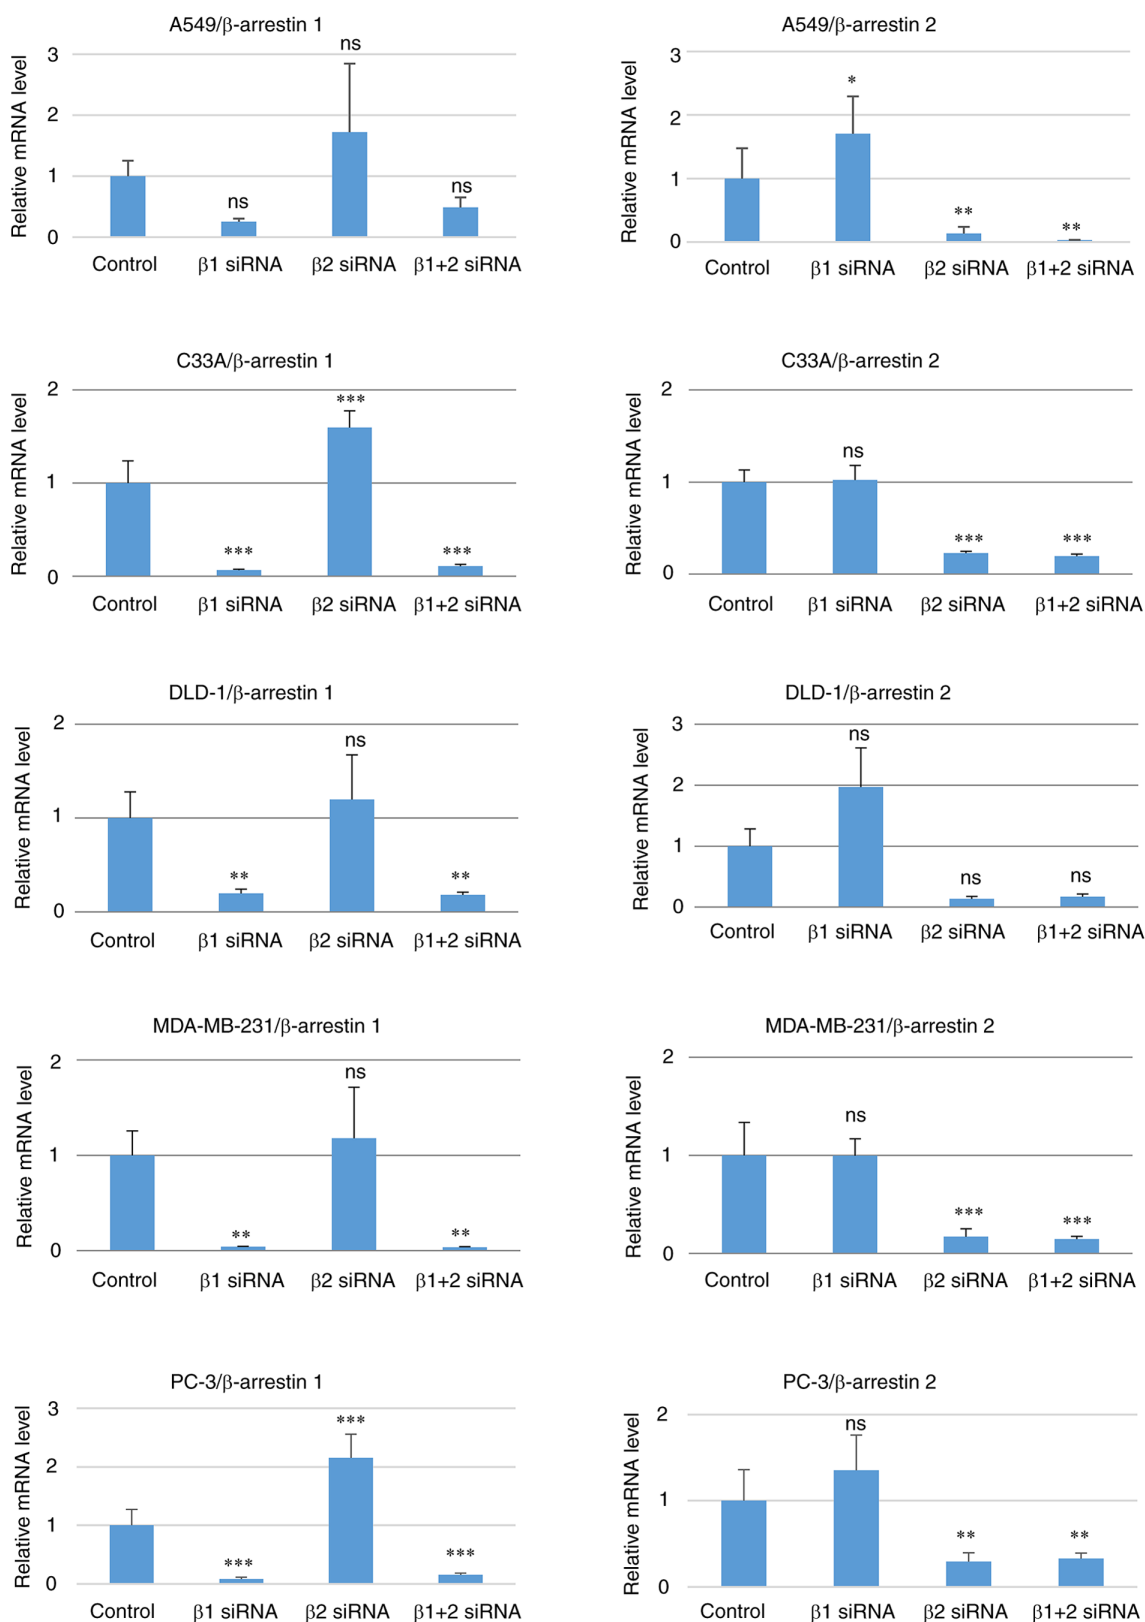

Figure S5. Representative images from chemotactic assay using  $\beta$ -arrestin-depleted cells. The various cancer cells (A-E) were transfected with small interfering RNA against both  $\beta$ -arrestin1 and  $\beta$ -arrestin2 mRNAs. Scale bar, 50  $\mu$ M. CXCL12, C-X-C motif chemokine 12; PTX, pertussis toxin.

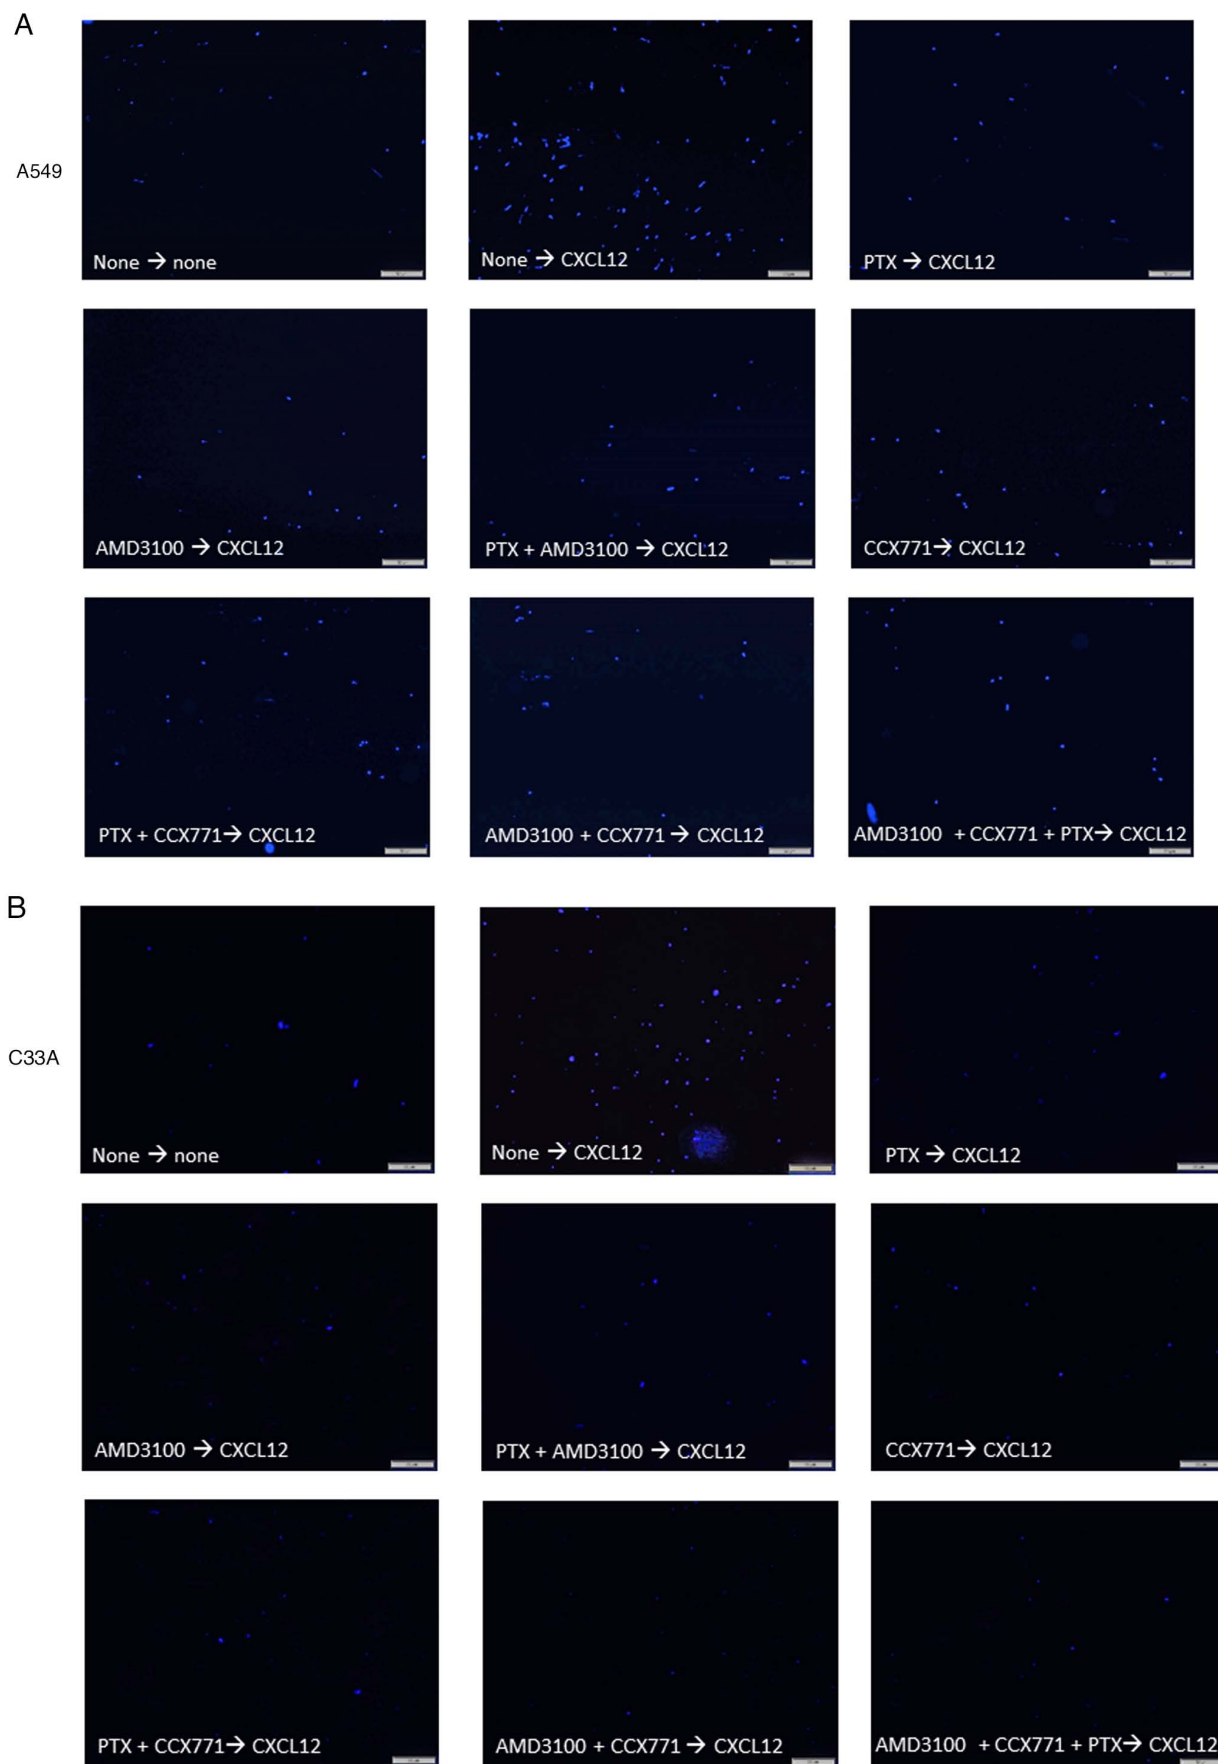

Figure S5. Continued.

C

DLD-1

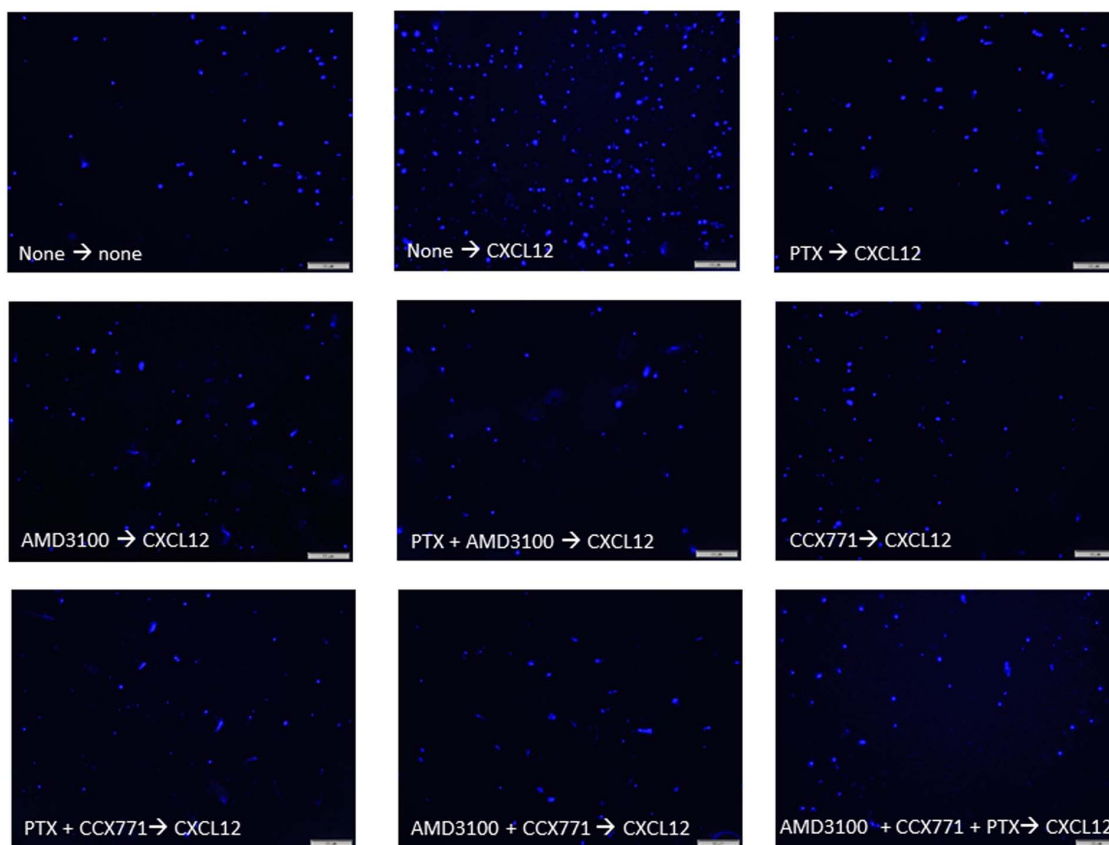

D

MDA-MB-231

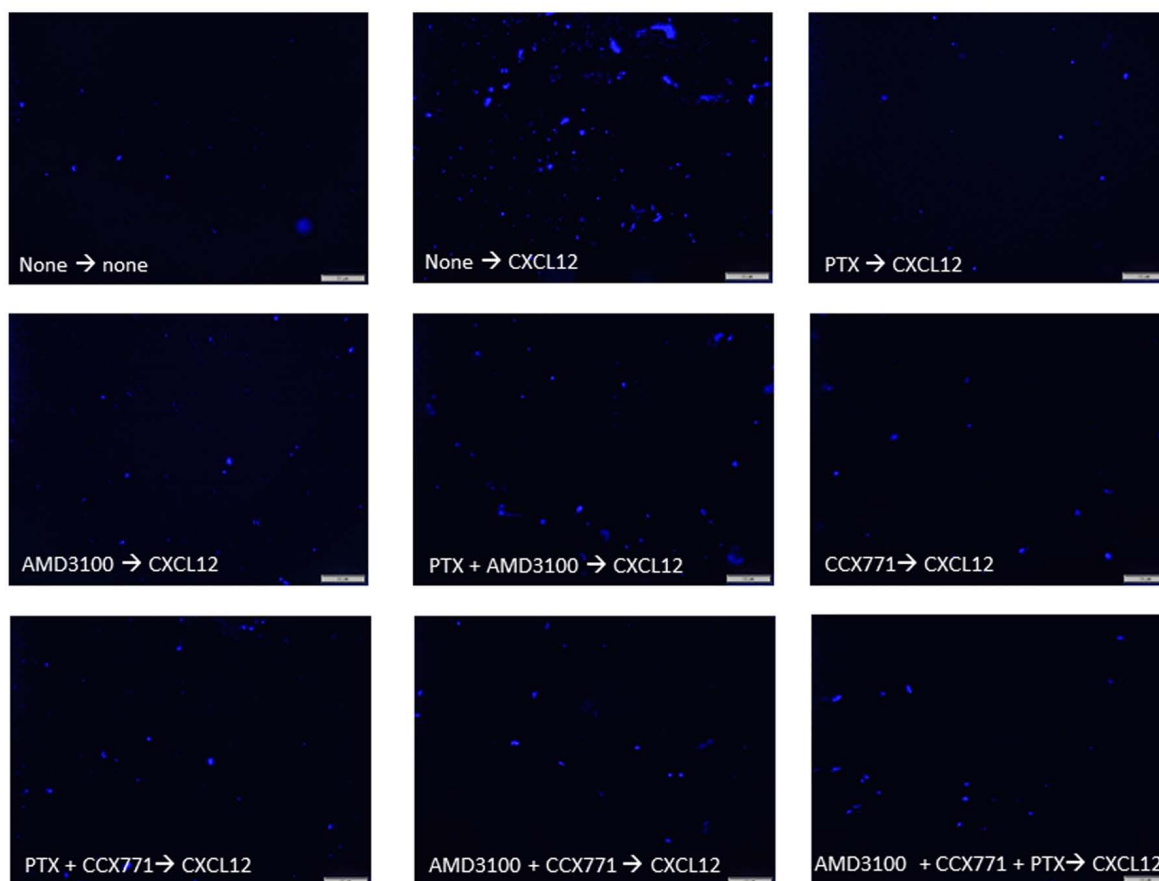

Figure S5. Continued.

E

PC3

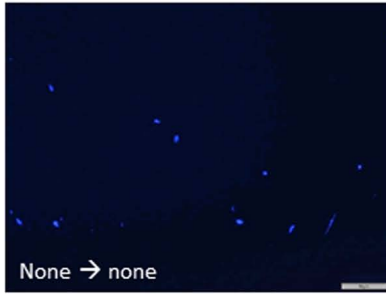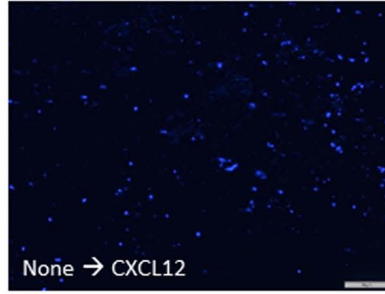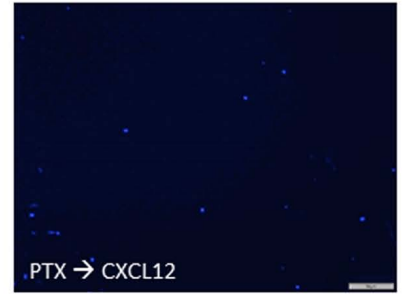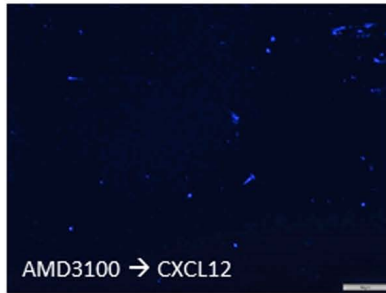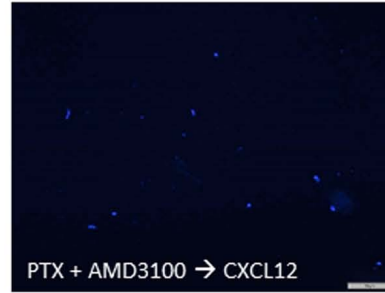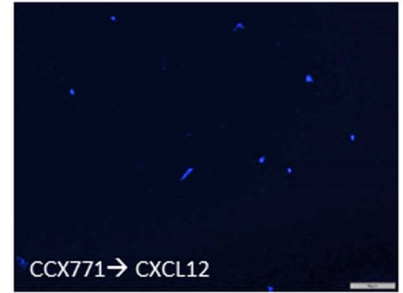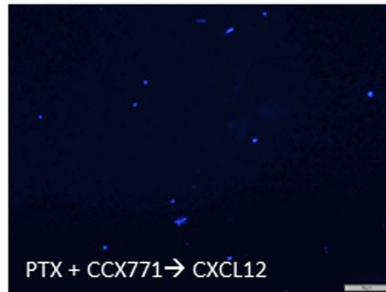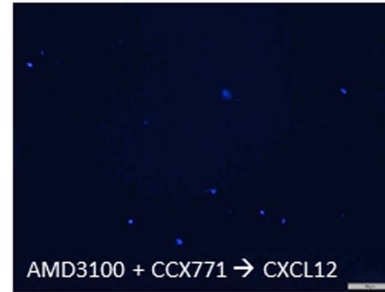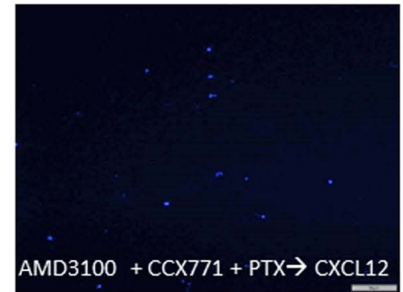

Figure S6. Transfection of cancer cells with control siRNA exhibits no major effect on the molecular mechanisms involved in CXCL12-dependent chemotaxis. Cancer cells were transfected with control siRNA and assayed for CXCL12 (100 ng/ml)-induced chemotaxis after 2 days. In certain experiments, cells were additionally treated with either none, AMD3100 (10  $\mu$ M, 1 h), CCX771 (100 nM, 1 h), PTX (100 ng/ml, 24 h) or their combinations. Data are presented as the mean migration index  $\pm$  SD (n=5-12). <sup>a</sup>P<0.001 vs. control; <sup>b</sup>P<0.001 vs. none. CXCL12, C-X-C motif chemokine 12; PTX, pertussis toxin; siRNA, small interfering RNA.

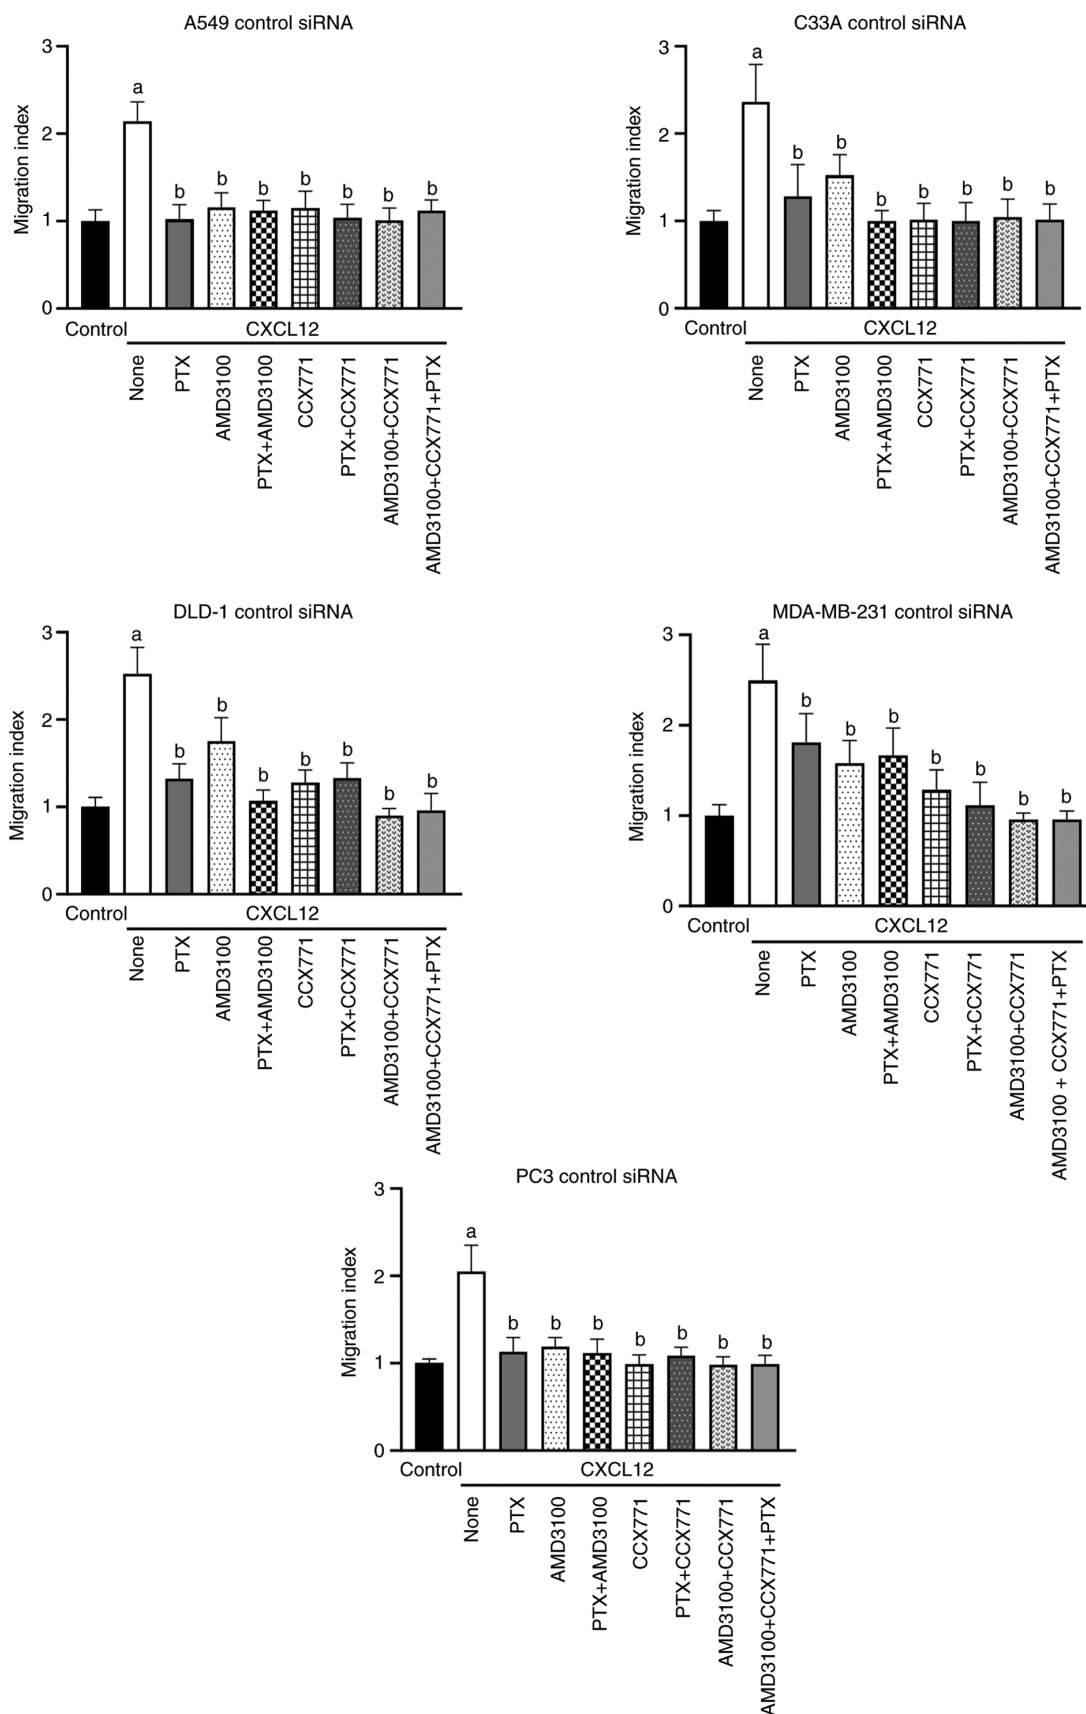

Figure S7. Representative images from chemotactic assay using control small interfering RNA-transfected cells (A-E). Scale bar, 50  $\mu$ M. CXCL12, C-X-C motif chemokine 12; PTX, pertussis toxin.

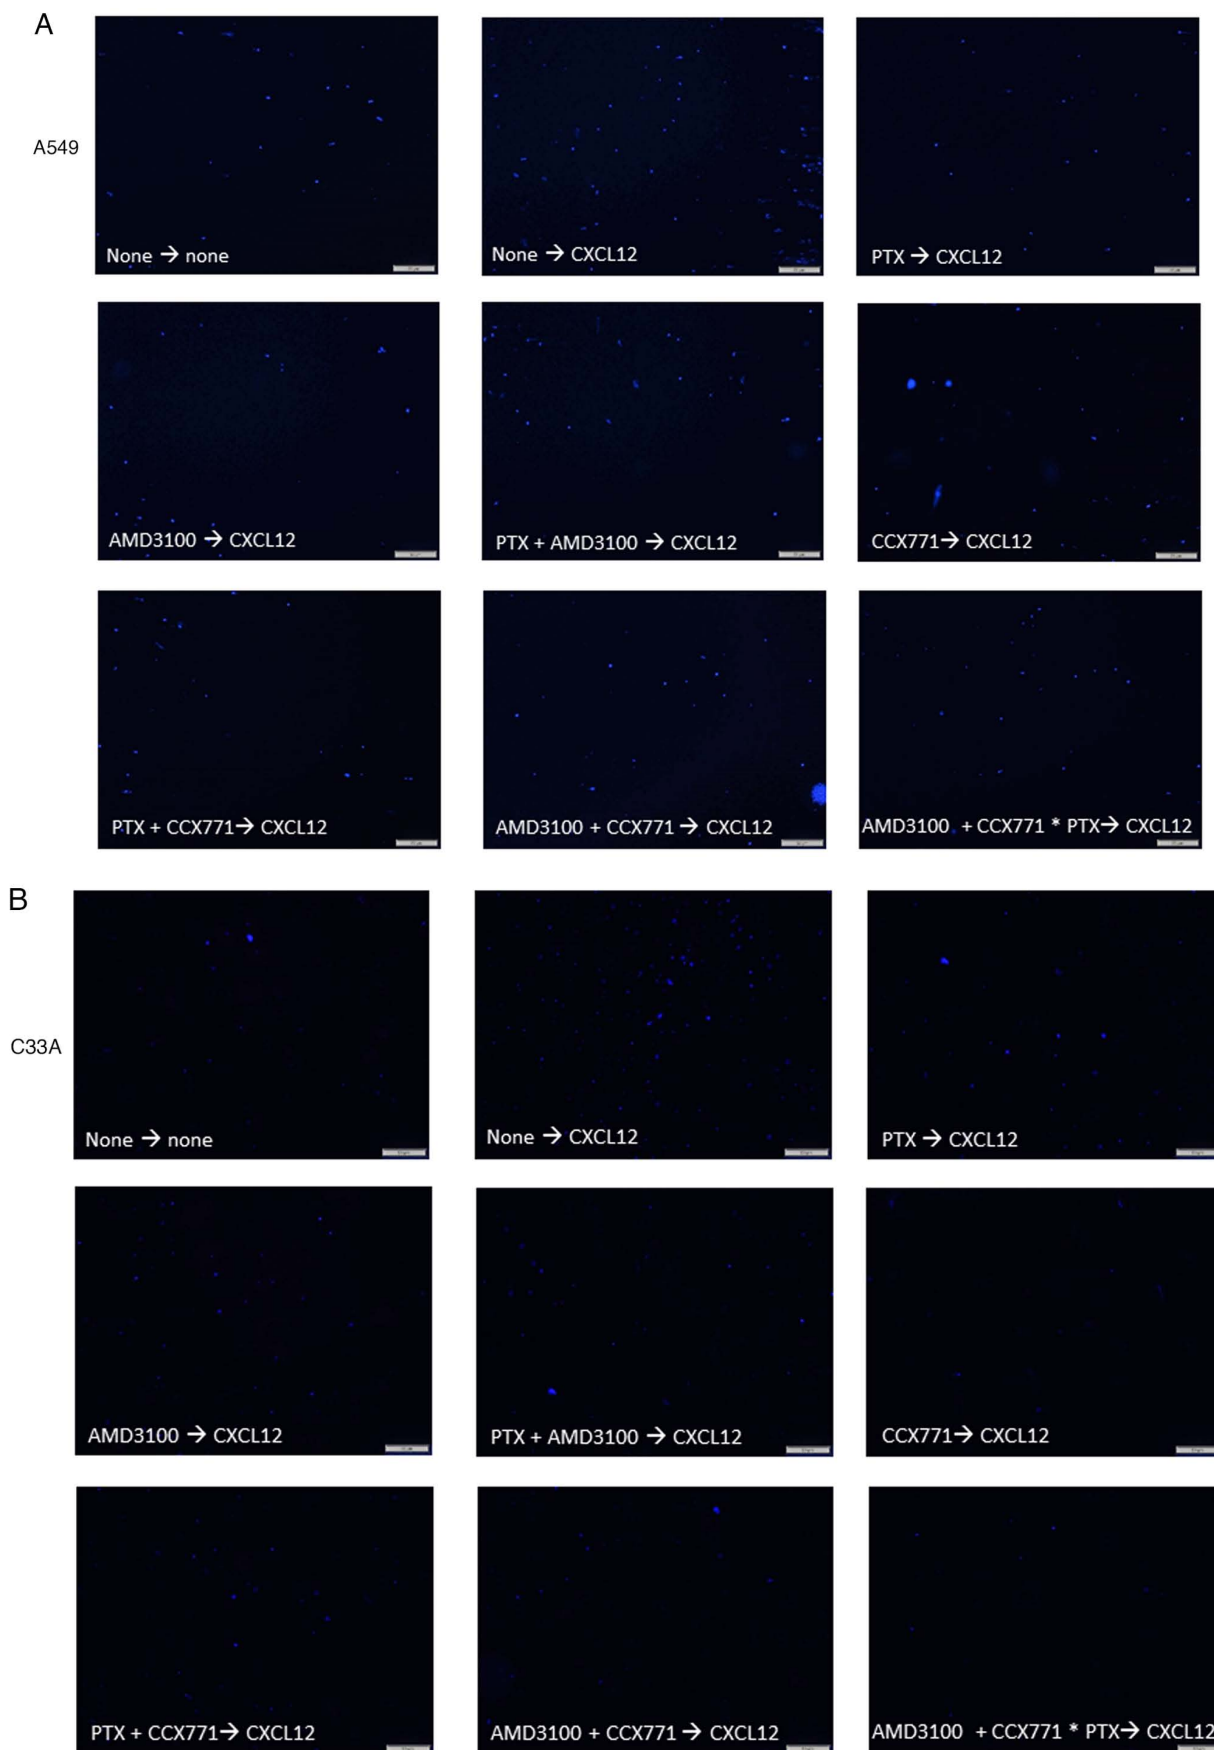

Figure S7. Continued.

C

DLD-1

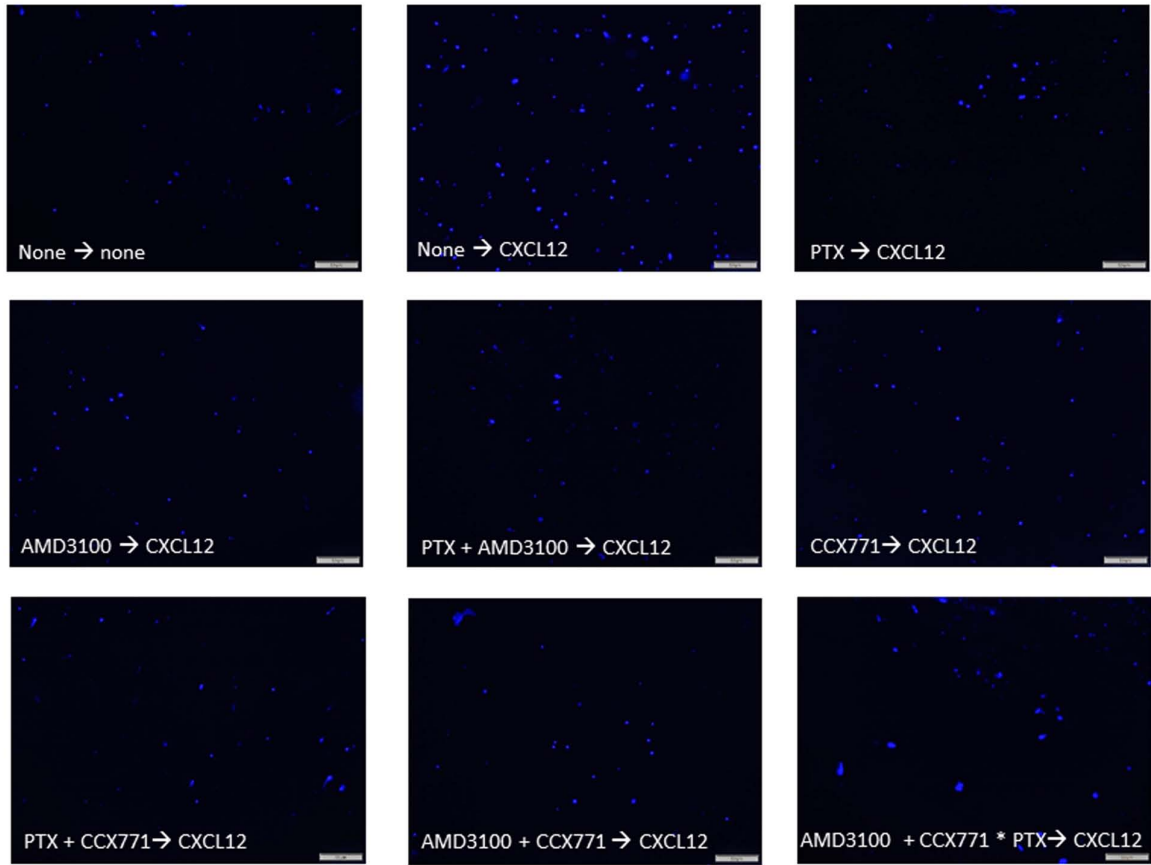

D

MDA-MB-231

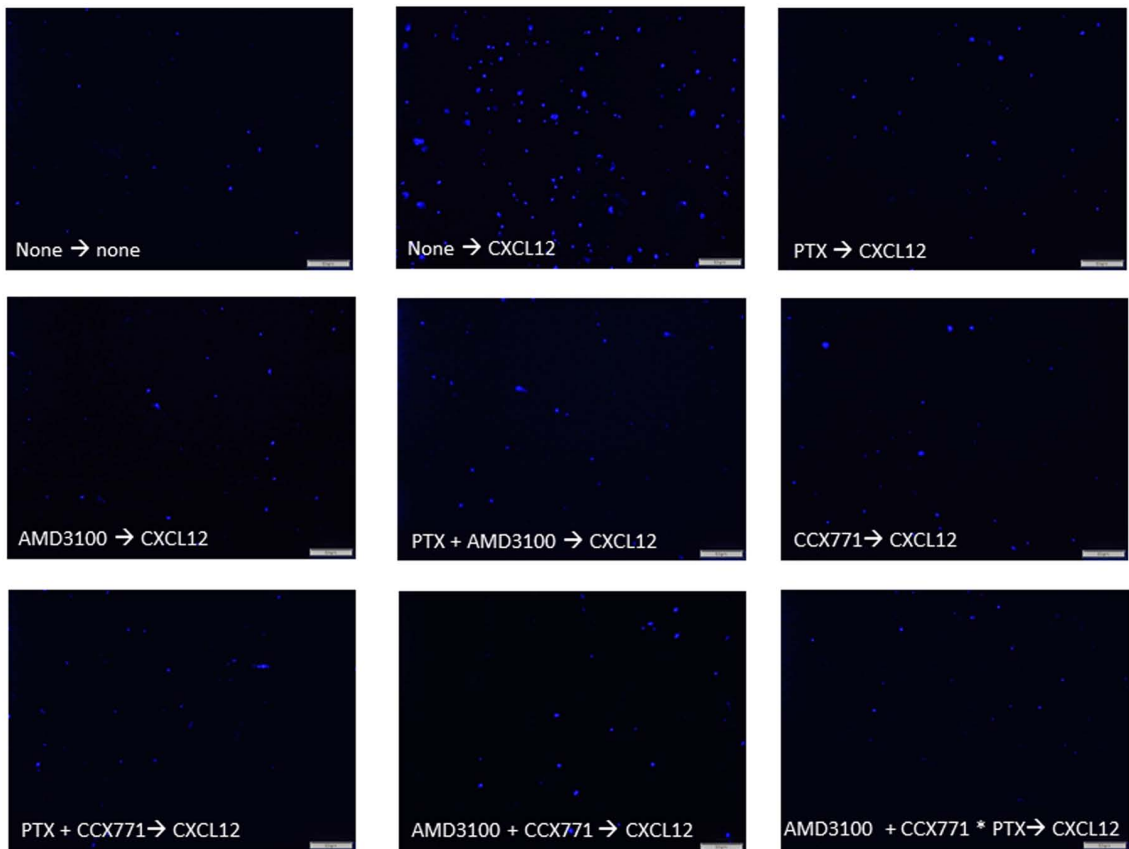

Figure S7. Continued.

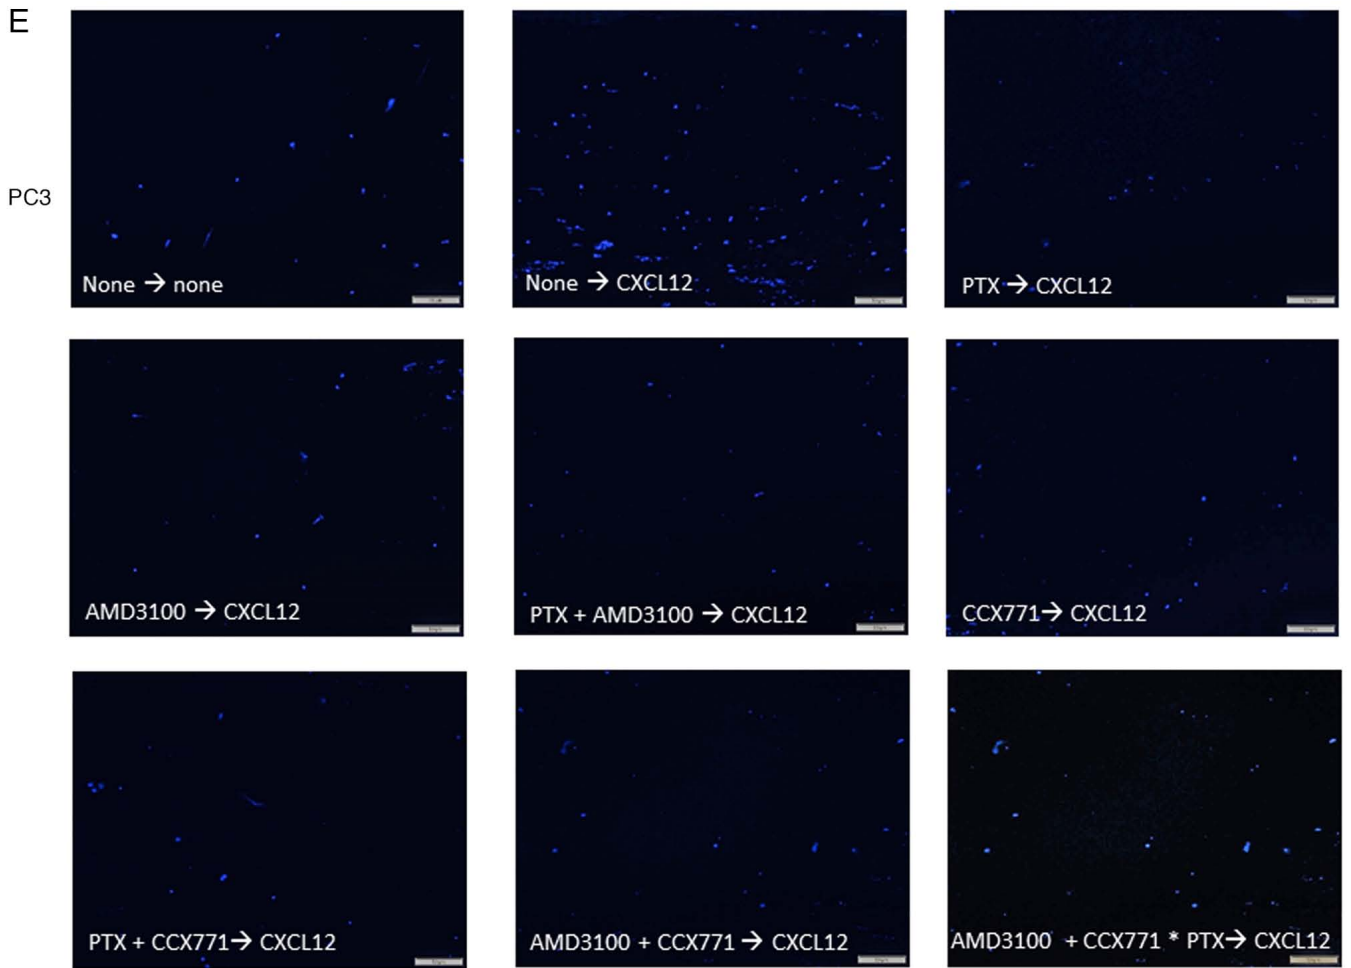

Figure S8. Cancer cell lines express EGFR at different levels that are not affected by inhibitors. Cell lines were treated with PTX (100 ng/ml) for 24 h or AG1478 (2  $\mu$ M) and Src-I-1 (1  $\mu$ M) for 1 h, and subsequently EGFR expression was analyzed by western blotting. To control for protein loading, blots were re-probed with  $\beta$ -actin antibodies. MW, molecular weight; PTX, pertussis toxin; Src-I-1, Src inhibitor-1.

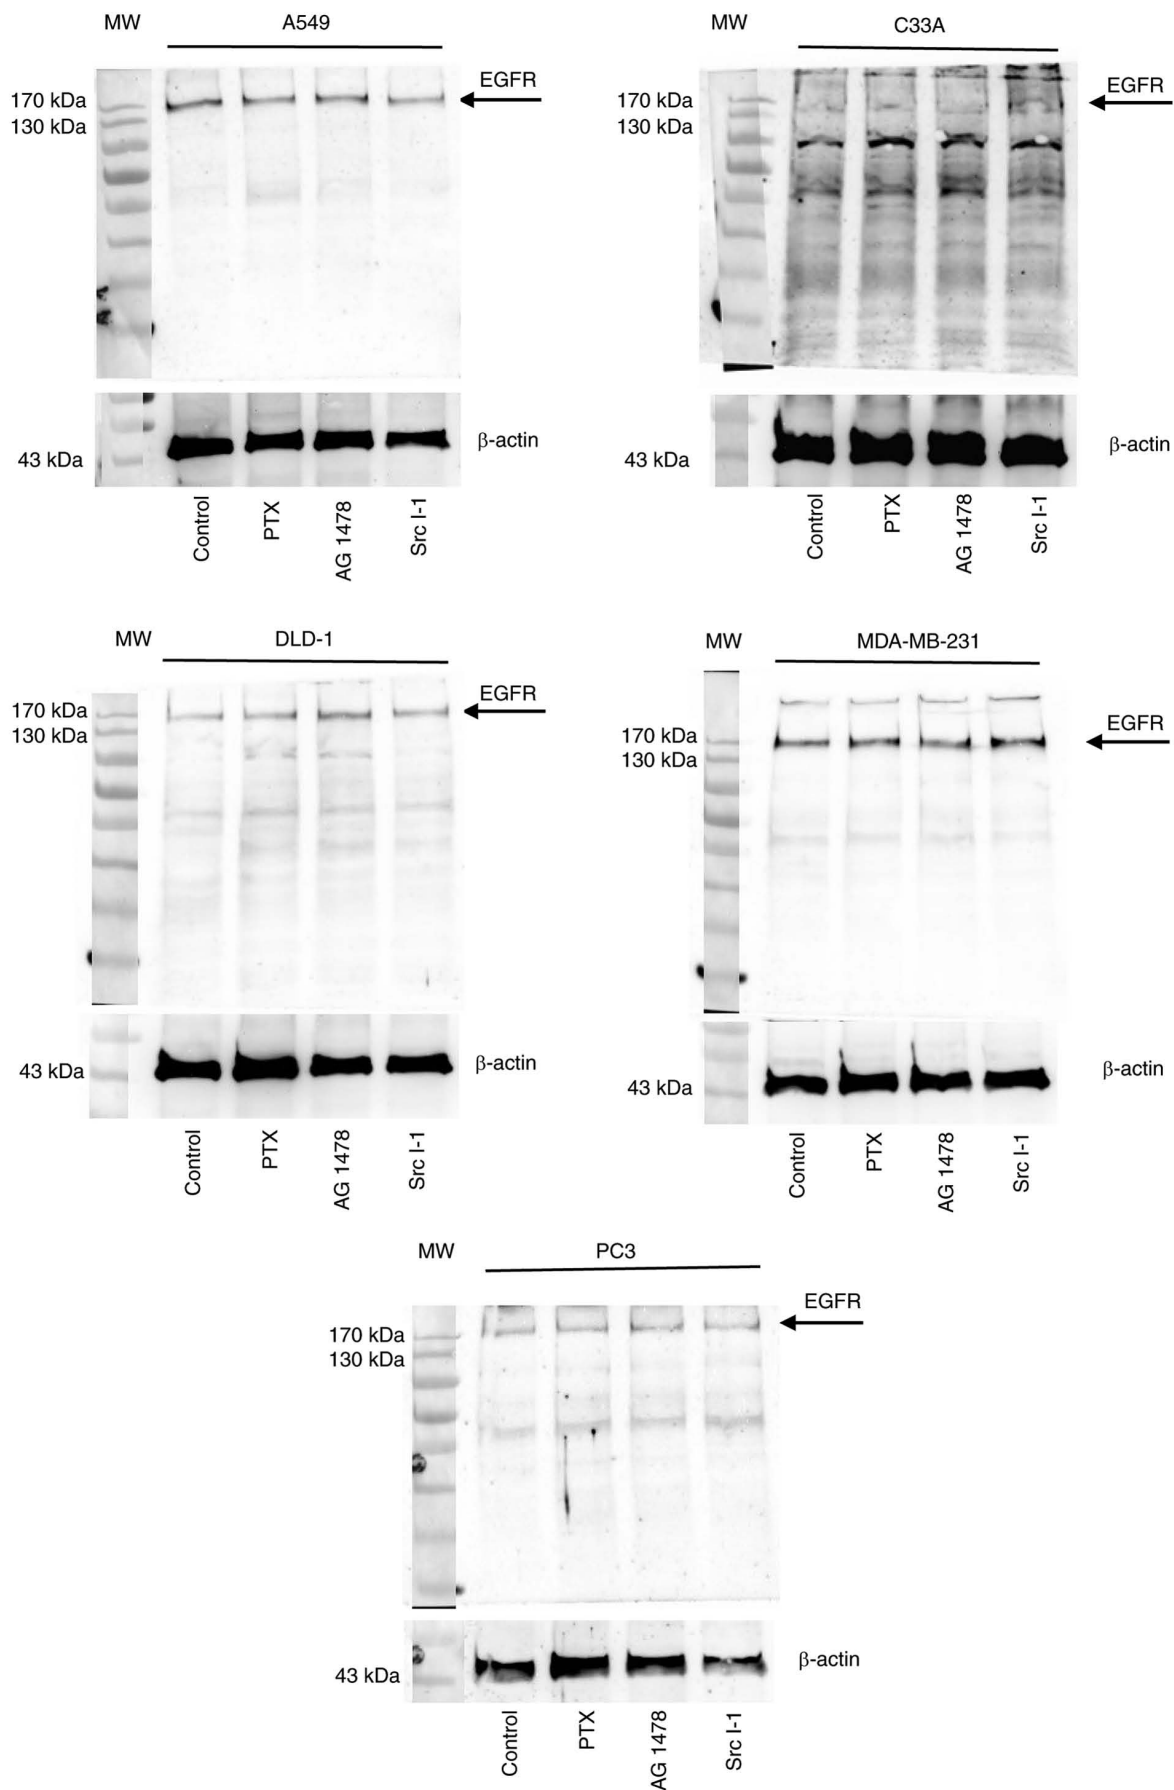

Figure S9. Representative images from chemotactic assay using the various AG1478-treated cells (A-E). Scale bar, 50  $\mu$ M. CXCL12, C-X-C motif chemokine 12; PTX, pertussis toxin.

A A549

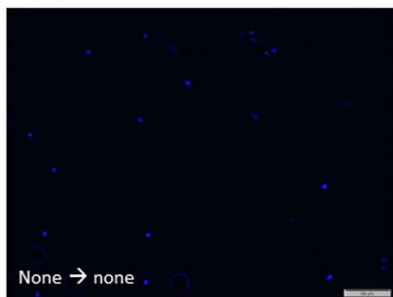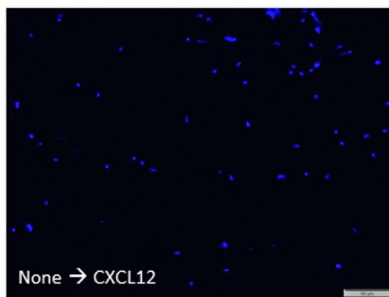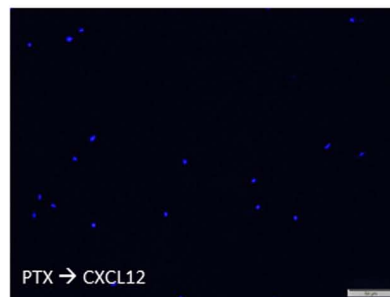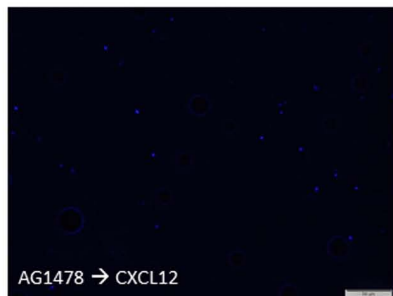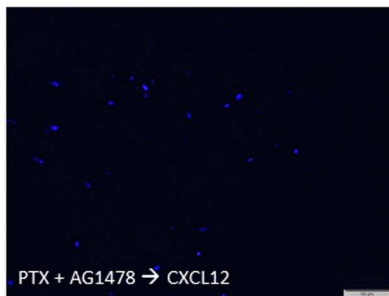

B C33A

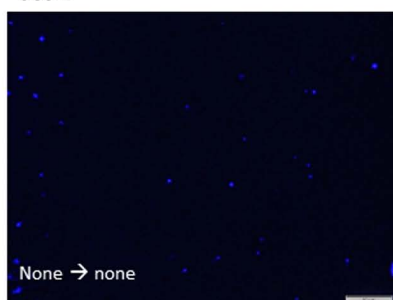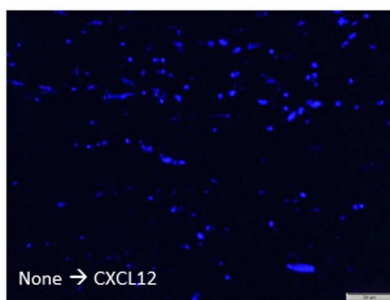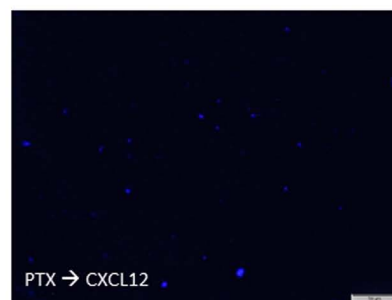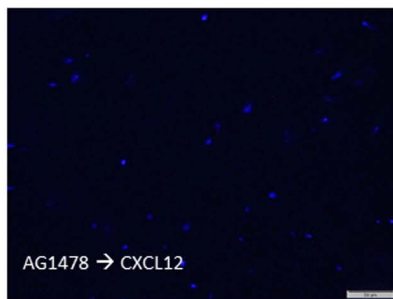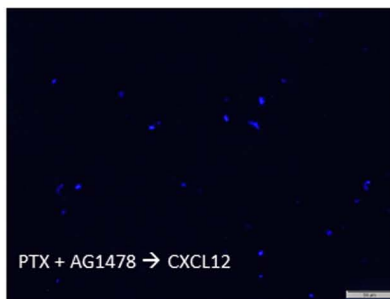

Figure S9. Continued.

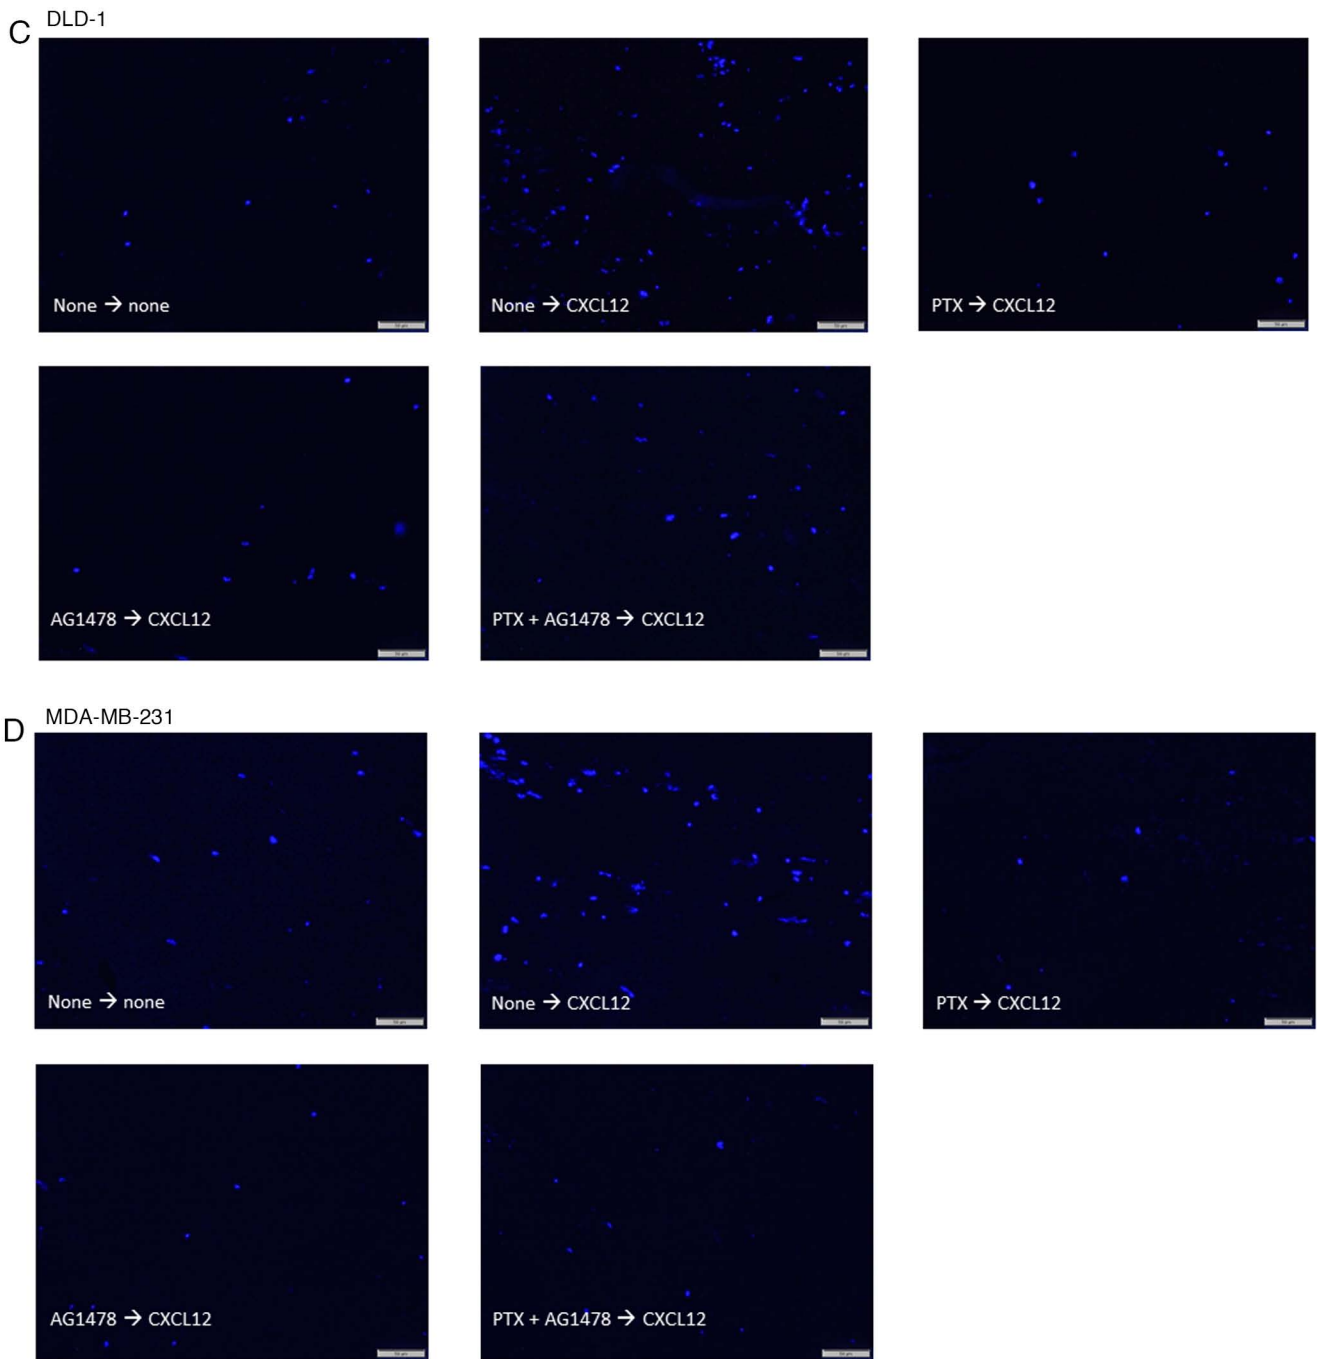

Figure S9. Continued.

E PC-3

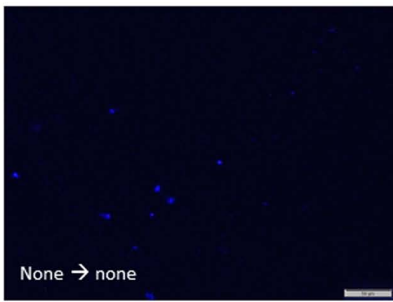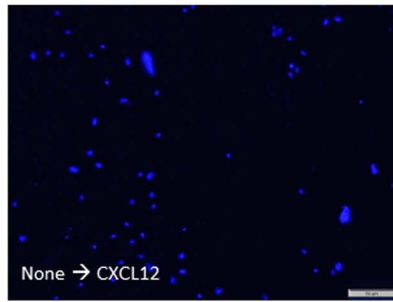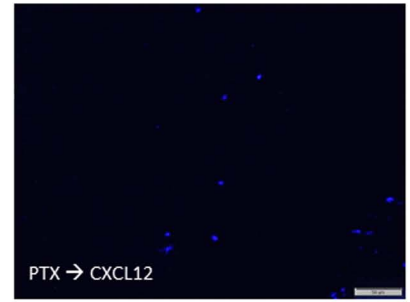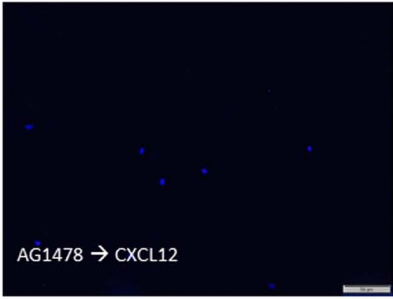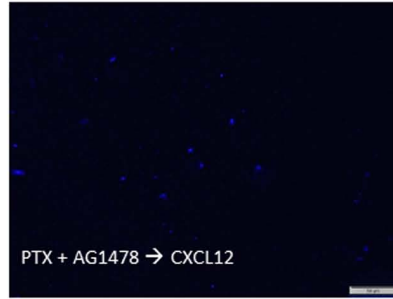

Figure S10. Representative images from chemotactic assay using the various Src-II-treated cells (A-E). Scale bar, 50  $\mu$ M. CXCL12, C-X-C motif chemokine 12; PTX, pertussis toxin; Src-II, Src inhibitor-1.

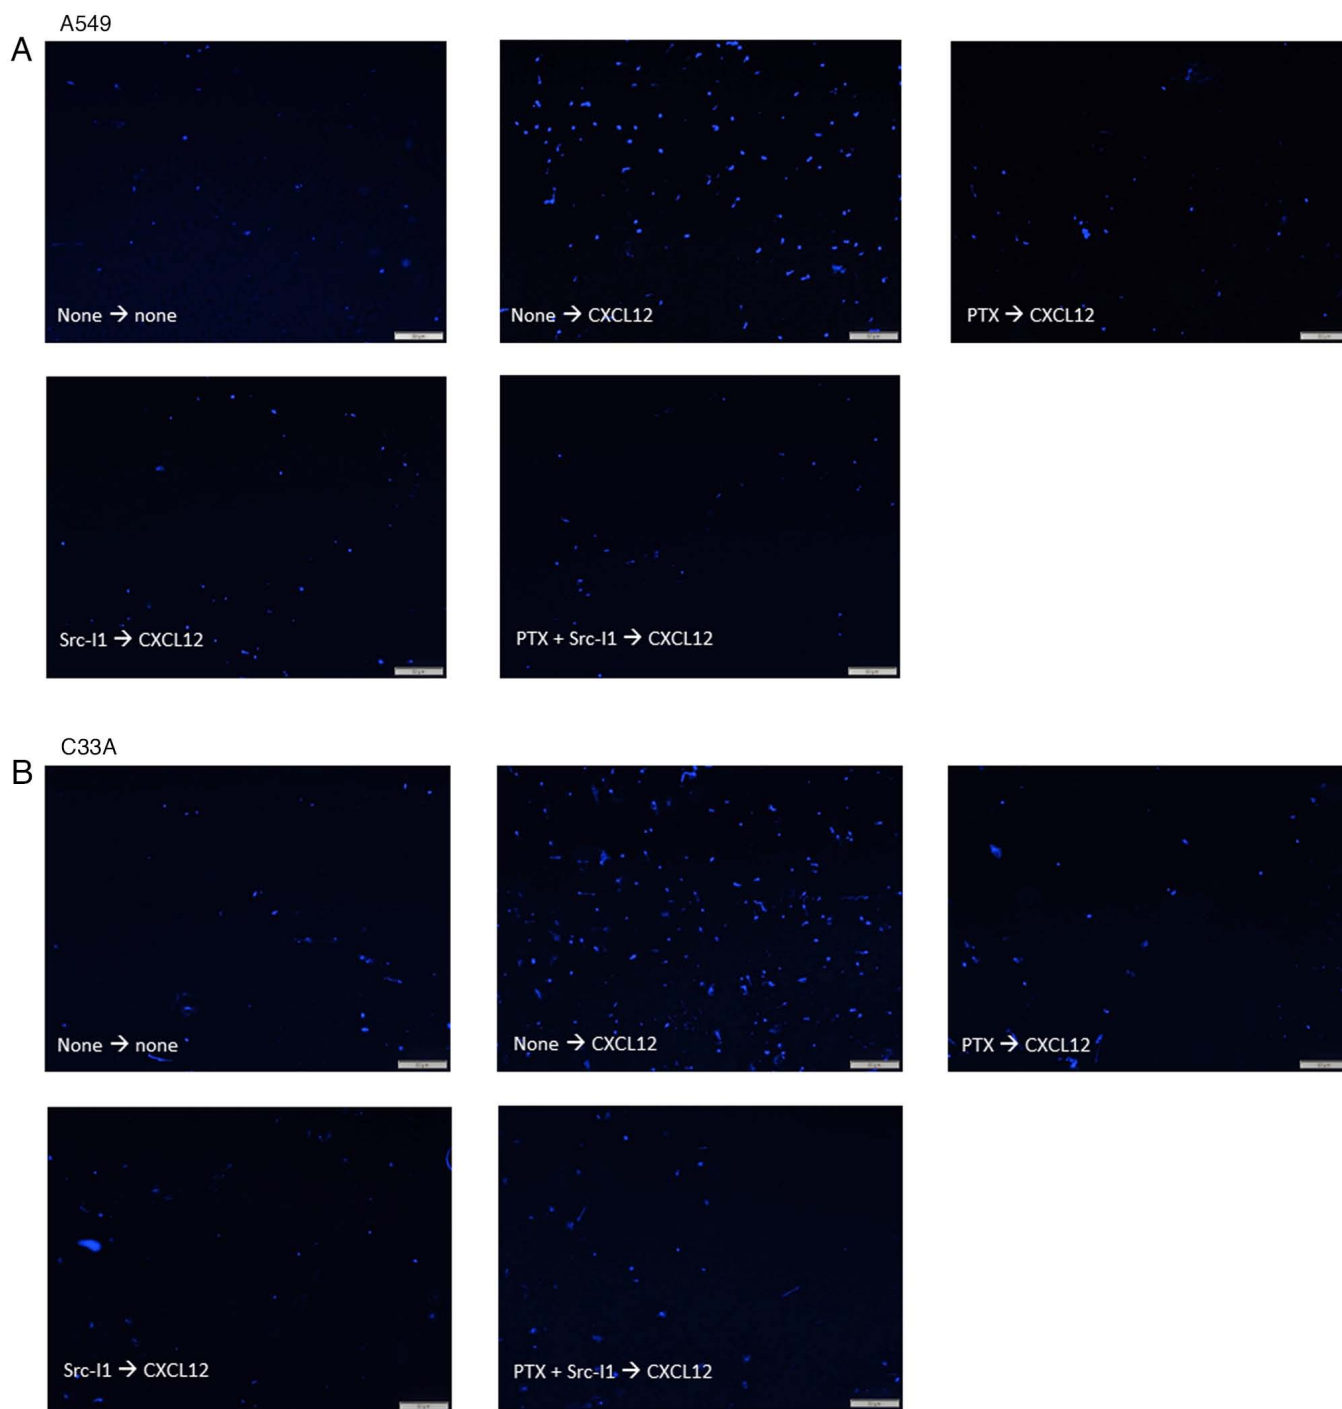

Figure S10. Continued.

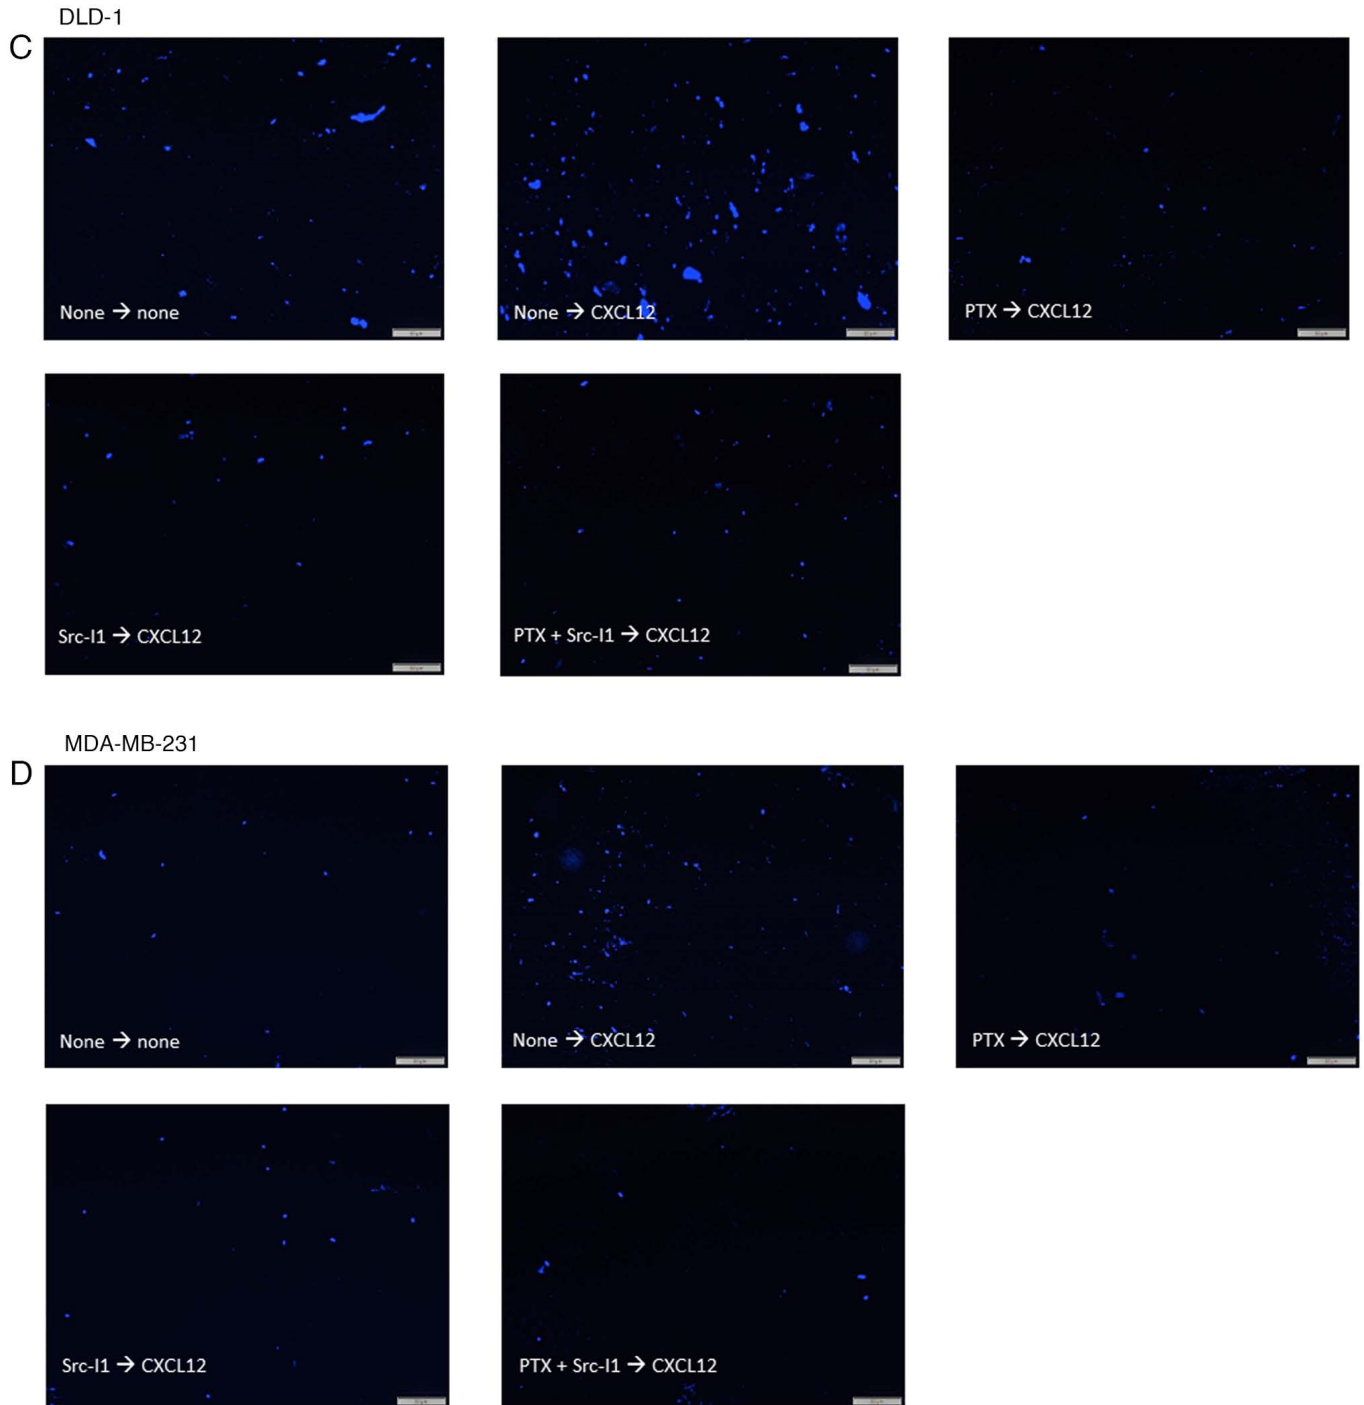

Figure S10. Continued.

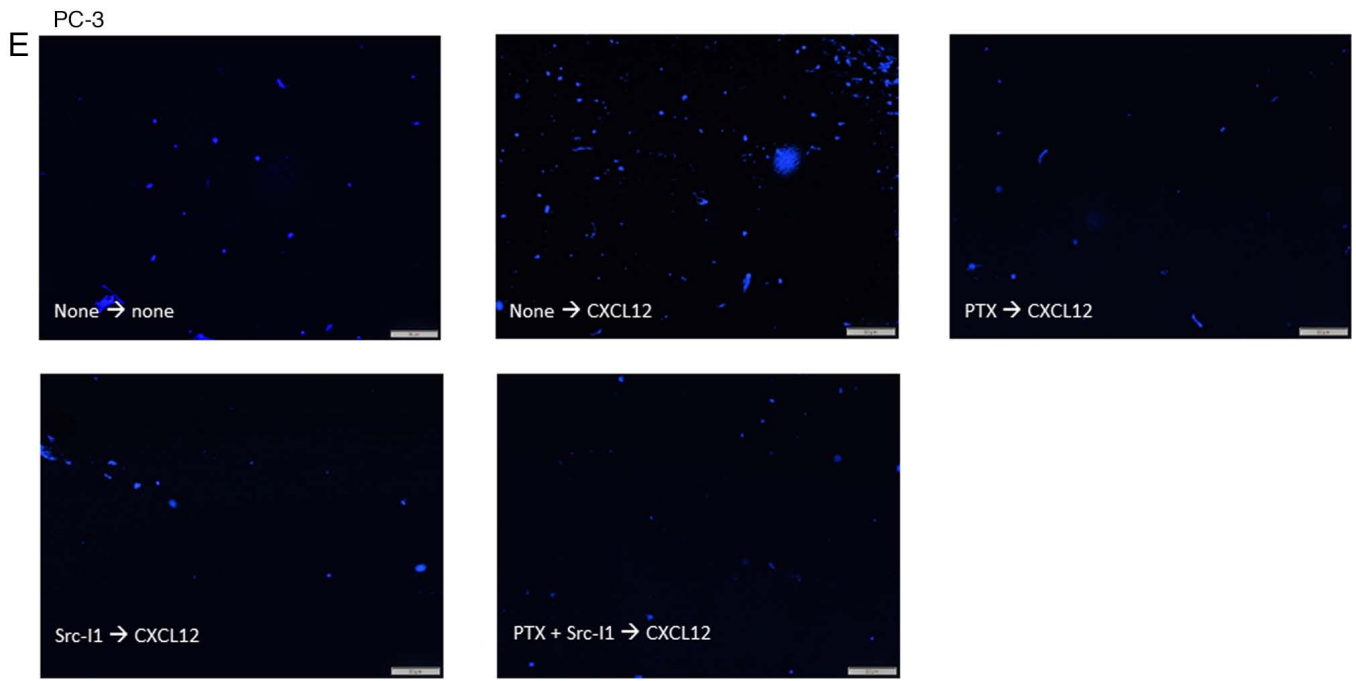

Supplement: Supplementary file 1 [file downloadSupplementary]
